# Supplementary material
Source: Springer Nature journal article supplement (https://www.springermedizin.de/resource/supplementary/12885_2013_4781_MOESM1_ESM.pdf/9467248)
Supplement: MOESM1 [file 9467248]

## Additional Material

**eTable 1: Data sources and methods used for costing health-related resources**

| Category                                                     | Source for resource use                                                                                                                                           | Source for costs                                                                                                                                   |
|--------------------------------------------------------------|-------------------------------------------------------------------------------------------------------------------------------------------------------------------|----------------------------------------------------------------------------------------------------------------------------------------------------|
| <b>Hospitalization</b>                                       | CIHI Discharge Abstract database[1]                                                                                                                               | Resource Intensity Weight (RIW) methodology[2] using CIHI Discharge Abstract database                                                              |
| <b>Chemotherapy</b>                                          | NDFP database[3]                                                                                                                                                  | Cost per case from NDFP database                                                                                                                   |
|                                                              | Other outpatient chemotherapies: Pre-2003 OHIP database[4] (codes G281, G381, G339, G345 or G359);<br>Post-2003 NACRS database (code for “main problem” of Z51·1) | Post-2003 average cost per visit: RIW methodology using NACRS database[5]. Average then applied to all chemo visits pre-2003.                      |
| <b>Physician Services*</b>                                   | OHIP database                                                                                                                                                     | OHIP billing claims                                                                                                                                |
| <b>Emergency Room visits / Same Day Surgery or procedure</b> | Pre-2002 ER visits: OHIP database<br>Pre-2002 Same Day Surgery: CIHI Discharge Abstract database<br>Post-2002 ER and Same Day Surgery: NACRS database             | Post-2002 average cost per visit: RIW methodology using NACRS database. Average then applied to all visits pre-2002.                               |
| <b>Prescription drugs**</b>                                  | Ontario Drug Benefit Plan (ODB)[6]                                                                                                                                | ODB prescription records                                                                                                                           |
| <b>Radiation treatment</b>                                   | NHPIP codes and number of minutes for the procedure from the Activity Level Reporting database                                                                    | Cost per visit: Estimated unit cost/minute from Earle et al.'s [7] inflated to 2009 dollar (\$11·92) multiplied by the NHPIP unit for each patient |
| <b>Complex Continuing Care***</b>                            | Mean weighted-days: Continuing Care Reporting System (case-mix index multiplied by duration between events)                                                       | Cost per weighed-day from Hospital e-scorecard[8] inflated to 2009 dollar (\$459·10)                                                               |
| <b>Home care services****</b>                                | Ontario Home Care Administrative System & Home Care Database                                                                                                      | Community Care Access Centre[9] database                                                                                                           |

\* Physician Services include inpatient and outpatient laboratory / imaging services

\*\* ODB covers prescription drug utilization of elderly and low income patients

\*\*\*Complex Continuing Care includes long term medical care, geriatric assessment, rehabilitation, psychogeriatric, palliative and respite care

\*\*\*\*Home care services include visiting professionals, personal, homemaking and community support

CIHI = The Canadian Institute for Health Information; NDFP = New Drug Funding Program; OHIP = Ontario Health Insurance Plan; NACRS = National Ambulatory Care Reporting Service; NHPIP = National Health Productivity Improvement Program

**eTable 2: Ontario Cancer Databases & Registered Persons Database**

| Database                                           | Description                                                                                                                                                                                                             |
|----------------------------------------------------|-------------------------------------------------------------------------------------------------------------------------------------------------------------------------------------------------------------------------|
| <b>Ontario Cancer Registry (OCR)[10-12]</b>        | Contains all cancer diagnoses in Ontario                                                                                                                                                                                |
| <b>New Drug Funding Program database (NDFP)[3]</b> | Describes the use of intravenous cancer drugs                                                                                                                                                                           |
| <b>Activity Level Reporting System (ALR)</b>       | Describes chemotherapy and radiation therapy administered in 41 cancer centres and related general hospitals, capturing approximately 60% of the chemotherapy and 100% of the radiation therapy administered in Ontario |
| <b>Registered Persons Database (RPDB)</b>          | Describes patients' demographics and vital statuses                                                                                                                                                                     |

### **Web References**

1. Juurlink D, Preya C, Croxford R, Chong A: **Canadian Institute for Health Information Discharge Abstract Database: a validation study**. In: *ICES Investigative Report*. Toronto, ON: Institute for Clinical Evaluative Sciences; 2006.
2. **Canadian MIS Database-Hospital Financial Performance Indicators, 1999-2000 to 2008-2009: Methodological Notes**. In.: Canadian Institute for Health Information; 2010: 1-34.
3. Evans WK, Nefsky M, Pater J, Browman G, Cowan DH: **Cancer Care Ontario's New Drug Funding Program: controlled introduction of expensive anticancer drugs**. *Chron Dis Can* 2002, **23**(4):152-156.
4. Lee R, Hutnik CML: **Projected cost comparison of selective laser trabeculoplasty versus glaucoma medication in the Ontario Health Insurance Plan**. *Can J Ophthalmol-J Can Ophthalmol* 2006, **41**(4):449-456.
5. Jacobs P, Yim R: **Using Canadian administrative databases to derive economic data for health technology assessments**. In. Ottawa: Canadian Agency for Drugs and Technologies in Health; 2009.
6. **Ontario Drug Benefit : The Program**  
[\[http://www.health.gov.on.ca/english/public/pub/drugs/odb.html\]](http://www.health.gov.on.ca/english/public/pub/drugs/odb.html)
7. Earle C, Coyle D, Smith A, Agboola O, Evans WK: **The cost of radiotherapy at an Ontario regional cancer centre: a re-evaluation**. *Critical Reviews in Oncology Hematology* 1999, **32**(2):87-93.
8. **Hospital e-Scorecard Report 2008: Complex Continuing Care: Financial Performance and Condition Technical Summary**. In.: Ontario Ministry of Health and Long-Term Care; 2008.
9. **CCAC Comparative Reports 2005/2006 YE Final**. In.: Ontario Ministry of Health and Long-Term Care; 2006.
10. Brenner DR, Tammemaegi MC, Bull SB, Pinnaduwaige D, Andrulis IL: **Using cancer registry data: agreement in cause-of-death data between the Ontario Cancer Registry and a longitudinal study of breast cancer patients**. *Chron Dis Can* 2009, **30**(1):16-19.
11. Cuffe S, Booth CM, Peng YW, Darling GE, Li G, Kong WD, Mackillop WJ, Shepherd FA: **Adjuvant Chemotherapy for Non-Small-Cell Lung Cancer in the Elderly: A Population-Based Study in Ontario, Canada**. *J Clin Oncol* 2012, **30**(15):1813-1821.
12. Hall S, Schulze K, Groome P, Mackillop W, Holowaty E: **Using cancer registry data for survival studies: the example of the Ontario Cancer Registry**. *J Clin Epidemiol* 2006, **59**(1):67-76.
